# Supplementary material
Source: PubMed Central journal article supplement (PMC6088356)
Supplement: ml8b00097_si_001.pdf [file ml8b00097_si_001.pdf]

# **Investigating the behavior of published PAINS alerts using a pharmaceutical company dataset: Supporting Information**

Lewis R. Vidler\*, Ian A. Watson, Brandon J. Margolis, David J. Cummins, and Michael Brunavs

## Contents

**Table S1. Promiscuity data on 62 PAINS alerts matching compounds with data**

**Table S2. Stability data on 46 PAINS alerts matching compounds with data**

**Table S3. Cytotoxicity data on 53 PAINS alerts matching compounds with data**

**Table S4. Summary of all hill slope data included in analysis of PAINS alerts**

**Table S5. Summary of data for compounds matching the PAINS alerts**

**Table S6. Hill slope data on 59 PAINS alerts matching compounds with data**

**Table S7. Summary of findings across all issues by alert**

**PAINS SMARTS Queries discussion**

**Statistical assessments of the different datasets**

**Experimental: LCMS purity method**

**Table S1. Promiscuity data on 62 PAINS alerts matching compounds with data.**

| PAINS Alert         | Actives | Data Points | % Active | Unique Compounds | Assays Active <sup>a</sup> | Assays Tested | Gene Families Active <sup>b</sup> | Gene Families Tested | PAINS Activity Enrichment <sup>c</sup> |
|---------------------|---------|-------------|----------|------------------|----------------------------|---------------|-----------------------------------|----------------------|----------------------------------------|
| dyes3A              | 2       | 3           | 66.7     | 1                | 2                          | 3             | 1                                 | 2                    | 4.9*                                   |
| anil_di_alk_A       | 29846   | 114572      | 26       | 5291             | 870                        | 1847          | 14                                | 14                   | 1.9*                                   |
| naphth_amino_B      | 3       | 15          | 20       | 3                | 3                          | 15            | 2                                 | 5                    | 1.5                                    |
| imidazole_A         | 1612    | 9895        | 16.3     | 413              | 135                        | 653           | 13                                | 14                   | 1.2*                                   |
| het_pyridiniums_A   | 277     | 1752        | 15.8     | 126              | 128                        | 483           | 8                                 | 13                   | 1.2*                                   |
| azo_A               | 514     | 3387        | 15.2     | 718              | 166                        | 659           | 10                                | 13                   | 1.1*                                   |
| catechol_A          | 628     | 4527        | 13.9     | 448              | 268                        | 874           | 11                                | 13                   | 1                                      |
| ene_rhod_A          | 1501    | 10999       | 13.6     | 1033             | 296                        | 874           | 12                                | 15                   | 1                                      |
| anil_alk_ene        | 549     | 4067        | 13.5     | 430              | 166                        | 570           | 11                                | 13                   | 1                                      |
| thio_carbonate_A    | 4       | 30          | 13.3     | 3                | 4                          | 28            | 2                                 | 7                    | 1                                      |
| quinone_A           | 774     | 5818        | 13.3     | 590              | 267                        | 753           | 10                                | 13                   | 1                                      |
| ene_five_het_E      | 12      | 97          | 12.4     | 8                | 12                         | 74            | 3                                 | 10                   | 0.9                                    |
| dhp_bis_amino_CN    | 8       | 67          | 11.9     | 3                | 5                          | 42            | 2                                 | 7                    | 0.9                                    |
| cyano_pyridone_B    | 228     | 1990        | 11.5     | 91               | 143                        | 518           | 9                                 | 14                   | 0.8                                    |
| thiophene_amino_Aa  | 406     | 3632        | 11.2     | 223              | 142                        | 508           | 10                                | 13                   | 0.8                                    |
| pyrrole_B           | 222     | 2153        | 10.3     | 179              | 46                         | 326           | 8                                 | 12                   | 0.8                                    |
| cyano_pyridone_A    | 205     | 2041        | 10       | 105              | 73                         | 365           | 8                                 | 13                   | 0.7                                    |
| sulfonamide_A       | 32      | 319         | 10       | 17               | 32                         | 265           | 4                                 | 10                   | 0.7                                    |
| amino_acridine_A    | 177     | 1812        | 9.8      | 128              | 61                         | 380           | 7                                 | 12                   | 0.7                                    |
| ene_five_het_B      | 106     | 1118        | 9.5      | 75               | 100                        | 467           | 7                                 | 13                   | 0.7                                    |
| rhod_sat_A          | 88      | 948         | 9.3      | 56               | 39                         | 237           | 6                                 | 12                   | 0.7                                    |
| ene_five_het_F      | 18      | 201         | 9        | 9                | 16                         | 115           | 5                                 | 12                   | 0.7                                    |
| sulfonamide_B       | 84      | 1049        | 8        | 104              | 35                         | 229           | 8                                 | 13                   | 0.6                                    |
| anil_no_alk         | 544     | 7278        | 7.5      | 511              | 245                        | 875           | 12                                | 15                   | 0.5                                    |
| thio_dibenzo        | 54      | 768         | 7        | 49               | 40                         | 227           | 5                                 | 12                   | 0.5                                    |
| naphth_amino_A      | 161     | 2315        | 7        | 100              | 81                         | 353           | 9                                 | 14                   | 0.5                                    |
| anthranil_one_A     | 314     | 4569        | 6.9      | 308              | 166                        | 751           | 11                                | 14                   | 0.5                                    |
| anil_di_alk_C       | 2106    | 31649       | 6.7      | 2167             | 332                        | 1215          | 15                                | 16                   | 0.5                                    |
| anil_di_alk_B       | 300     | 4537        | 6.6      | 324              | 195                        | 633           | 13                                | 15                   | 0.5                                    |
| ene_one_hal         | 71      | 1092        | 6.5      | 105              | 49                         | 275           | 9                                 | 13                   | 0.5                                    |
| pyrrole_A           | 662     | 10722       | 6.2      | 666              | 261                        | 830           | 12                                | 13                   | 0.4                                    |
| anil_di_alk_E       | 972     | 16696       | 5.8      | 1210             | 262                        | 1016          | 15                                | 16                   | 0.4                                    |
| hzone_acyl_naphthol | 4       | 69          | 5.8      | 15               | 4                          | 54            | 2                                 | 9                    | 0.4                                    |
| imine_one_fives     | 9       | 160         | 5.6      | 29               | 8                          | 59            | 5                                 | 11                   | 0.4                                    |
| anil_di_alk_D       | 110     | 2239        | 4.9      | 170              | 40                         | 341           | 11                                | 14                   | 0.4                                    |
| keto_keto_beta_A    | 212     | 4842        | 4.4      | 285              | 122                        | 469           | 10                                | 13                   | 0.3                                    |
| ene_one_ene_A       | 4       | 93          | 4.3      | 15               | 3                          | 66            | 2                                 | 8                    | 0.3                                    |
| ene_cyano_A         | 10      | 237         | 4.2      | 11               | 9                          | 141           | 6                                 | 11                   | 0.3                                    |
| indol_3yl_alk       | 1124    | 27840       | 4        | 1866             | 258                        | 804           | 14                                | 16                   | 0.3                                    |
| mannich_A           | 801     | 20449       | 3.9      | 1336             | 246                        | 873           | 15                                | 16                   | 0.3                                    |
| ene_five_het_A      | 71      | 1908        | 3.7      | 195              | 53                         | 351           | 9                                 | 13                   | 0.3                                    |
| ene_five_one_A      | 36      | 968         | 3.7      | 69               | 26                         | 253           | 8                                 | 14                   | 0.3                                    |
| cyano_imine_A       | 3       | 86          | 3.5      | 10               | 3                          | 35            | 2                                 | 6                    | 0.3                                    |

|                           |    |      |     |     |    |     |    |    |            |
|---------------------------|----|------|-----|-----|----|-----|----|----|------------|
| <b>imine_one_A</b>        | 15 | 440  | 3.4 | 71  | 10 | 164 | 5  | 12 | <b>0.2</b> |
| <b>cyano_ene_amine_A</b>  | 1  | 32   | 3.1 | 4   | 1  | 23  | 1  | 3  | <b>0.2</b> |
| <b>thiophene_hydroxy</b>  | 7  | 229  | 3.1 | 19  | 7  | 87  | 4  | 11 | <b>0.2</b> |
| <b>het_6_tetrazine</b>    | 35 | 1223 | 2.9 | 42  | 18 | 185 | 6  | 13 | <b>0.2</b> |
| <b>thiophene_amino_Ab</b> | 72 | 2622 | 2.7 | 206 | 50 | 345 | 10 | 14 | <b>0.2</b> |
| <b>hzone_phenol_A</b>     | 37 | 1354 | 2.7 | 144 | 25 | 210 | 6  | 11 | <b>0.2</b> |
| <b>hzone_enamin</b>       | 22 | 832  | 2.6 | 93  | 16 | 183 | 5  | 12 | <b>0.2</b> |
| <b>hzone_phenol_B</b>     | 19 | 806  | 2.4 | 99  | 15 | 148 | 6  | 10 | <b>0.2</b> |
| <b>ene_five_het_C</b>     | 19 | 840  | 2.3 | 79  | 12 | 168 | 5  | 12 | <b>0.2</b> |
| <b>diazox_sulfon_A</b>    | 19 | 855  | 2.2 | 61  | 16 | 205 | 5  | 12 | <b>0.2</b> |
| <b>ene_six_het_A</b>      | 52 | 2353 | 2.2 | 200 | 29 | 271 | 8  | 13 | <b>0.2</b> |
| <b>anthranil_acid_A</b>   | 1  | 49   | 2   | 5   | 1  | 35  | 1  | 8  | <b>0.1</b> |
| <b>het_65_A</b>           | 9  | 463  | 1.9 | 23  | 7  | 172 | 5  | 12 | <b>0.1</b> |
| <b>thiaz_ene_A</b>        | 96 | 5667 | 1.7 | 288 | 58 | 561 | 11 | 13 | <b>0.1</b> |
| <b>thiaz_ene_B</b>        | 5  | 331  | 1.5 | 10  | 5  | 102 | 3  | 11 | <b>0.1</b> |
| <b>ene_one_ester</b>      | 3  | 237  | 1.3 | 14  | 2  | 84  | 2  | 10 | <b>0.1</b> |
| <b>imine_one_isatin</b>   | 11 | 1867 | 0.6 | 116 | 10 | 243 | 5  | 8  | <b>0</b>   |
| <b>hzone_pipzn</b>        | 1  | 422  | 0.2 | 54  | 1  | 38  | 1  | 4  | <b>0</b>   |
| <b>hzone_anil_di_alk</b>  | 0  | 27   | 0   | 3   | 0  | 27  | 0  | 3  | <b>0</b>   |

<sup>a</sup>Assays for which at least one molecule matching the rule is found active. <sup>b</sup>Gene families for which at least one molecule matching the rule is found active. <sup>c</sup>A star indicates statistical significance (FDR<0.1)

**Table S2. Stability data on 47 PAINS alerts matching compounds with data.**

| <b>PAINS<br/>Alert</b> | <b>Measured<br/>Impure</b> | <b>Data<br/>Points</b> | <b>%<br/>Impure</b> | <b>Unique<br/>Compounds</b> | <b>PAINS<br/>Instability<br/>Enrichment<sup>a</sup></b> |
|------------------------|----------------------------|------------------------|---------------------|-----------------------------|---------------------------------------------------------|
| dhp_bis_amino_CN       | 1                          | 1                      | 100.0               | 1                           | <b>19.0</b>                                             |
| ene_five_het_C         | 1                          | 1                      | 100.0               | 1                           | <b>19.0</b>                                             |
| ene_five_one_A         | 1                          | 1                      | 100.0               | 1                           | <b>19.0</b>                                             |
| ene_one_ene_A          | 1                          | 1                      | 100.0               | 1                           | <b>19.0</b>                                             |
| thio_dibenzo           | 1                          | 1                      | 100.0               | 1                           | <b>19.0</b>                                             |
| pyrrole_B              | 8                          | 9                      | 88.9                | 9                           | <b>16.9*</b>                                            |
| keto_keto_beta_A       | 3                          | 5                      | 60.0                | 5                           | <b>11.4*</b>                                            |
| anil_alk_ene           | 10                         | 19                     | 52.6                | 19                          | <b>10.0*</b>                                            |
| ene_five_het_E         | 1                          | 2                      | 50.0                | 2                           | <b>9.5</b>                                              |
| quinone_A              | 29                         | 60                     | 48.3                | 60                          | <b>9.2*</b>                                             |
| cyano_pyridone_A       | 5                          | 13                     | 38.5                | 13                          | <b>7.3*</b>                                             |
| ene_one_hal            | 4                          | 11                     | 36.4                | 11                          | <b>6.9</b>                                              |
| azo_A                  | 103                        | 291                    | 35.4                | 291                         | <b>6.7*</b>                                             |
| anil_di_alk_B          | 7                          | 21                     | 33.3                | 21                          | <b>6.3*</b>                                             |
| het_pyridiniums_A      | 2                          | 6                      | 33.3                | 6                           | <b>6.3*</b>                                             |
| pyrrole_A              | 3                          | 10                     | 30.0                | 10                          | <b>5.7*</b>                                             |
| ene_rhod_A             | 7                          | 25                     | 28.0                | 25                          | <b>5.3*</b>                                             |
| catechol_A             | 6                          | 29                     | 20.7                | 29                          | <b>3.9*</b>                                             |
| anil_di_alk_D          | 2                          | 10                     | 20.0                | 10                          | <b>3.8</b>                                              |
| anil_di_alk_C          | 37                         | 203                    | 18.2                | 203                         | <b>3.5*</b>                                             |
| anthranil_one_A        | 5                          | 30                     | 16.7                | 30                          | <b>3.2</b>                                              |
| hzone_phenol_A         | 1                          | 6                      | 16.7                | 6                           | <b>3.2</b>                                              |
| thiaz_ene_A            | 1                          | 6                      | 16.7                | 6                           | <b>3.2</b>                                              |
| thiophene_amino_Aa     | 4                          | 24                     | 16.7                | 24                          | <b>3.2*</b>                                             |
| mannich_A              | 15                         | 143                    | 10.5                | 143                         | <b>2.0*</b>                                             |
| indol_3yl_alk          | 9                          | 155                    | 5.8                 | 155                         | <b>1.1</b>                                              |
| anil_no_alk            | 2                          | 46                     | 4.3                 | 46                          | <b>0.8</b>                                              |
| anil_di_alk_A          | 42                         | 1326                   | 3.2                 | 1326                        | <b>0.6</b>                                              |
| anil_di_alk_E          | 11                         | 377                    | 2.9                 | 377                         | <b>0.6</b>                                              |
| thiophene_amino_Ab     | 1                          | 91                     | 1.1                 | 91                          | <b>0.2</b>                                              |
| cyano_imine_B          | 0                          | 1                      | 0.0                 | 1                           | <b>0.0</b>                                              |
| cyano_pyridone_B       | 0                          | 14                     | 0.0                 | 14                          | <b>0.0</b>                                              |
| diazox_sulfon_A        | 0                          | 4                      | 0.0                 | 4                           | <b>0.0</b>                                              |
| ene_cyano_A            | 0                          | 3                      | 0.0                 | 3                           | <b>0.0</b>                                              |
| ene_five_het_A         | 0                          | 1                      | 0.0                 | 1                           | <b>0.0</b>                                              |
| ene_five_het_B         | 0                          | 2                      | 0.0                 | 2                           | <b>0.0</b>                                              |
| ene_six_het_A          | 0                          | 1                      | 0.0                 | 1                           | <b>0.0</b>                                              |
| het_65_A               | 0                          | 1                      | 0.0                 | 1                           | <b>0.0</b>                                              |
| het_6_tetrazine        | 0                          | 2                      | 0.0                 | 2                           | <b>0.0</b>                                              |
| hzone_enamin           | 0                          | 3                      | 0.0                 | 3                           | <b>0.0</b>                                              |
| hzone_phenol_B         | 0                          | 2                      | 0.0                 | 2                           | <b>0.0</b>                                              |
| imine_one_A            | 0                          | 1                      | 0.0                 | 1                           | <b>0.0</b>                                              |
| naphth_amino_A         | 0                          | 1                      | 0.0                 | 1                           | <b>0.0</b>                                              |

|               |   |   |     |   |            |
|---------------|---|---|-----|---|------------|
| rhod_sat_A    | 0 | 2 | 0.0 | 2 | <b>0.0</b> |
| sulfonamide_A | 0 | 1 | 0.0 | 1 | <b>0.0</b> |
| sulfonamide_B | 0 | 3 | 0.0 | 3 | <b>0.0</b> |

<sup>a</sup>A star indicates a statistically significant increase (FDR<0.1)

Table S3. Cytotoxicity data on 53 PAINS alerts matching compounds with data.

| PAINS Alert        | Measured Cytotoxic | Data Points | % Cytotoxic | Unique Compounds | Assays Cytotoxic <sup>a</sup> | Assays Tested | % Assays Cytotoxic | PAINS Cytotoxicity enrichment <sup>b</sup> |
|--------------------|--------------------|-------------|-------------|------------------|-------------------------------|---------------|--------------------|--------------------------------------------|
| quinone_A          | 352                | 574         | 61.3        | 81               | 217                           | 246           | 88.2               | <b>4.0*</b>                                |
| amino_acridine_A   | 44                 | 85          | 51.8        | 17               | 22                            | 42            | 52.4               | <b>3.4*</b>                                |
| ene_cyano_A        | 13                 | 28          | 46.4        | 2                | 13                            | 28            | 46.4               | <b>3.0</b>                                 |
| anil_alk_ene       | 44                 | 109         | 40.4        | 42               | 33                            | 69            | 47.8               | <b>2.6*</b>                                |
| ene_one_ene_A      | 4                  | 10          | 40.0        | 2                | 4                             | 10            | 40.0               | <b>2.6</b>                                 |
| ene_five_het_B     | 3                  | 8           | 37.5        | 5                | 3                             | 6             | 50.0               | <b>2.5</b>                                 |
| anthranil_one_A    | 71                 | 190         | 37.4        | 53               | 64                            | 100           | 64.0               | <b>2.5*</b>                                |
| het_pyridiniums_A  | 237                | 646         | 36.7        | 64               | 42                            | 58            | 72.4               | <b>2.4*</b>                                |
| catechol_A         | 279                | 779         | 35.8        | 93               | 57                            | 144           | 39.6               | <b>2.3*</b>                                |
| ene_five_het_A     | 91                 | 288         | 31.6        | 14               | 91                            | 272           | 33.5               | <b>2.1*</b>                                |
| imidazole_A        | 70                 | 227         | 30.8        | 87               | 19                            | 44            | 43.2               | <b>2.0*</b>                                |
| ene_one_hal        | 11                 | 39          | 28.2        | 12               | 10                            | 26            | 38.5               | <b>1.8</b>                                 |
| anil_di_alk_A      | 1896               | 6939        | 27.3        | 1850             | 666                           | 755           | 88.2               | <b>1.8*</b>                                |
| imine_one_isatin   | 2                  | 8           | 25.0        | 1                | 2                             | 8             | 25.0               | <b>1.6</b>                                 |
| hzone_phenol_A     | 7                  | 30          | 23.3        | 13               | 6                             | 18            | 33.3               | <b>1.5</b>                                 |
| ene_rhod_A         | 40                 | 192         | 20.8        | 91               | 20                            | 51            | 39.2               | <b>1.4</b>                                 |
| naphth_amino_A     | 9                  | 44          | 20.5        | 25               | 9                             | 22            | 40.9               | <b>1.3</b>                                 |
| mannich_A          | 319                | 1581        | 20.2        | 409              | 241                           | 306           | 78.8               | <b>1.3*</b>                                |
| hzone_enamin       | 5                  | 25          | 20.0        | 10               | 5                             | 17            | 29.4               | <b>1.3</b>                                 |
| sulfonamide_B      | 22                 | 113         | 19.5        | 36               | 8                             | 35            | 22.9               | <b>1.3</b>                                 |
| azo_A              | 34                 | 214         | 15.9        | 80               | 16                            | 72            | 22.2               | <b>1.0</b>                                 |
| anil_no_alk        | 20                 | 135         | 14.8        | 99               | 12                            | 34            | 35.3               | <b>1.0</b>                                 |
| sulfonamide_A      | 18                 | 141         | 12.8        | 1                | 18                            | 141           | 12.8               | <b>0.8</b>                                 |
| thiophene_amino_Aa | 7                  | 55          | 12.7        | 34               | 5                             | 20            | 25.0               | <b>0.8</b>                                 |
| cyano_imine_B      | 2                  | 20          | 10.0        | 3                | 2                             | 12            | 16.7               | <b>0.7</b>                                 |
| pyrrole_B          | 3                  | 30          | 10.0        | 22               | 2                             | 11            | 18.2               | <b>0.7</b>                                 |
| anil_di_alk_E      | 82                 | 1028        | 8.0         | 303              | 31                            | 84            | 36.9               | <b>0.5</b>                                 |
| keto_keto_beta_A   | 18                 | 250         | 7.2         | 80               | 13                            | 49            | 26.5               | <b>0.5</b>                                 |
| thio_dibenzo       | 1                  | 16          | 6.3         | 8                | 1                             | 11            | 9.1                | <b>0.4</b>                                 |
| ene_five_het_E     | 1                  | 19          | 5.3         | 3                | 1                             | 11            | 9.1                | <b>0.3</b>                                 |
| het_6_tetrazine    | 1                  | 20          | 5.0         | 15               | 1                             | 8             | 12.5               | <b>0.3</b>                                 |
| anil_di_alk_B      | 4                  | 83          | 4.8         | 54               | 3                             | 31            | 9.7                | <b>0.3</b>                                 |
| cyano_pyridone_A   | 1                  | 21          | 4.8         | 13               | 1                             | 6             | 16.7               | <b>0.3</b>                                 |
| pyrrole_A          | 26                 | 548         | 4.7         | 115              | 21                            | 74            | 28.4               | <b>0.3</b>                                 |
| anil_di_alk_C      | 92                 | 2327        | 4.0         | 685              | 55                            | 142           | 38.7               | <b>0.3</b>                                 |
| indol_3yl_alk      | 77                 | 1971        | 3.9         | 473              | 38                            | 99            | 38.4               | <b>0.3</b>                                 |
| cyano_pyridone_B   | 1                  | 31          | 3.2         | 26               | 1                             | 6             | 16.7               | <b>0.2</b>                                 |
| diazox_sulfon_A    | 1                  | 32          | 3.1         | 15               | 1                             | 20            | 5.0                | <b>0.2</b>                                 |

|                     |   |     |     |    |   |    |     |            |
|---------------------|---|-----|-----|----|---|----|-----|------------|
| thiaz_ene_A         | 3 | 131 | 2.3 | 71 | 3 | 38 | 7.9 | <b>0.2</b> |
| thiophene_amino_Ab  | 2 | 342 | 0.6 | 54 | 2 | 22 | 9.1 | <b>0.0</b> |
| anil_di_alk_D       | 0 | 61  | 0.0 | 36 | 0 | 24 | 0.0 | <b>0.0</b> |
| anthranil_acid_A    | 0 | 1   | 0.0 | 1  | 0 | 1  | 0.0 | <b>0.0</b> |
| cyano_ene_amine_A   | 0 | 1   | 0.0 | 1  | 0 | 1  | 0.0 | <b>0.0</b> |
| ene_five_het_C      | 0 | 11  | 0.0 | 7  | 0 | 4  | 0.0 | <b>0.0</b> |
| ene_five_het_F      | 0 | 5   | 0.0 | 4  | 0 | 2  | 0.0 | <b>0.0</b> |
| ene_five_one_A      | 0 | 16  | 0.0 | 13 | 0 | 8  | 0.0 | <b>0.0</b> |
| ene_one_ester       | 0 | 15  | 0.0 | 2  | 0 | 15 | 0.0 | <b>0.0</b> |
| ene_six_het_A       | 0 | 14  | 0.0 | 11 | 0 | 3  | 0.0 | <b>0.0</b> |
| het_65_A            | 0 | 6   | 0.0 | 5  | 0 | 4  | 0.0 | <b>0.0</b> |
| hzone_acyl_naphthol | 0 | 1   | 0.0 | 1  | 0 | 1  | 0.0 | <b>0.0</b> |
| hzone_phenol_B      | 0 | 9   | 0.0 | 7  | 0 | 5  | 0.0 | <b>0.0</b> |
| imine_one_A         | 0 | 6   | 0.0 | 5  | 0 | 5  | 0.0 | <b>0.0</b> |
| imine_one_fives     | 0 | 6   | 0.0 | 2  | 0 | 5  | 0.0 | <b>0.0</b> |

<sup>a</sup>Assays for which at least one molecule matching the rule is found cytotoxic. <sup>b</sup>A star indicates statistical significance (FDR<0.1)

**Table S4. Summary of all hill slope data included in analysis of PAINS alerts**

| Assay Format   | High Hill Slope | Data Points      | % High Hill Slope | Unique Compounds | Unique Assays | Unique Gene Families |
|----------------|-----------------|------------------|-------------------|------------------|---------------|----------------------|
| AS             | 13,901          | 62,011           | 22.4              | 43,623           | 159           | 7                    |
| ELISA          | 16,177          | 56,304           | 28.7              | 38,073           | 154           | 6                    |
| FB             | 10,431          | 240,900          | 4.3               | 106,818          | 471           | 8                    |
| FP             | 16,956          | 117,026          | 14.4              | 56,478           | 116           | 6                    |
| FRET           | 23,612          | 752,537          | 3.3               | 103,445          | 601           | 10                   |
| SPA            | 18,449          | 219,108          | 8.4               | 95,649           | 344           | 11                   |
| <b>Overall</b> | <b>99,526</b>   | <b>1,447,886</b> | <b>6.9</b>        | <b>281,315</b>   | <b>1,845</b>  | <b>16</b>            |

**Table S5. Summary of hill slope data for compounds matching the PAINS alerts**

| Assay Format   | High Hill Slope | Data Points   | % High Hill Slope | Unique Compounds | Unique Assays | Unique Gene Families | PAINS Hill Slope enrichment (odds ratio) |
|----------------|-----------------|---------------|-------------------|------------------|---------------|----------------------|------------------------------------------|
| AS             | 476             | 2,682         | 17.7              | 1,789            | 106           | 7                    | <b>0.8 (0.72)</b>                        |
| ELISA          | 268             | 818           | 32.8              | 569              | 65            | 4                    | <b>1.1 (1.2)</b>                         |
| FB             | 279             | 5,723         | 4.9               | 2,187            | 249           | 8                    | <b>1.1 (1.1)</b>                         |
| FP             | 684             | 4,022         | 17.0              | 2,024            | 94            | 5                    | <b>1.2 (1.2)</b>                         |
| FRET           | 715             | 27,014        | 2.6               | 2,569            | 393           | 9                    | <b>0.8 (0.9)</b>                         |
| SPA            | 510             | 4,270         | 11.9              | 2,373            | 182           | 9                    | <b>1.4 (1.4)</b>                         |
| <b>Overall</b> | <b>2,858</b>    | <b>44,332</b> | <b>6.4</b>        | <b>6877</b>      | <b>1080</b>   | <b>15</b>            | <b>0.9 (1.0)</b>                         |

Table S6. Hill slope data on 61 PAINS alerts matching compounds with data.

| PAINS Alert         | High Hill Slope | Data Points | % High Hill Slope | Unique Compounds | Assays With High Hill Slope <sup>a</sup> | Assays Tested | Gene Families With High Hill Slope <sup>b</sup> | Gene Families Tested | PAINS Hill Slope Enrichment <sup>c</sup> |
|---------------------|-----------------|-------------|-------------------|------------------|------------------------------------------|---------------|-------------------------------------------------|----------------------|------------------------------------------|
| cyano_imine_A       | 1               | 1           | 100               | 1                | 1                                        | 1             | 1                                               | 1                    | 15.1                                     |
| cyano_ene_amine_A   | 1               | 2           | 50                | 1                | 1                                        | 2             | 1                                               | 1                    | 7.6                                      |
| dyes3A              | 1               | 2           | 50                | 1                | 1                                        | 2             | 1                                               | 1                    | 7.6                                      |
| thiaz_ene_B         | 3               | 6           | 50                | 3                | 3                                        | 6             | 2                                               | 4                    | 7.6*                                     |
| thio_carbonate_A    | 1               | 2           | 50                | 2                | 1                                        | 2             | 1                                               | 1                    | 7.6                                      |
| thiophene_hydroxy   | 1               | 2           | 50                | 2                | 1                                        | 2             | 1                                               | 2                    | 7.6                                      |
| het_65_A            | 3               | 9           | 33.3              | 8                | 2                                        | 7             | 2                                               | 5                    | 5                                        |
| ene_five_one_A      | 9               | 28          | 32.1              | 11               | 9                                        | 26            | 3                                               | 6                    | 4.9*                                     |
| het_6_tetrazine     | 6               | 21          | 28.6              | 14               | 4                                        | 12            | 3                                               | 4                    | 4.3*                                     |
| cyano_pyridone_A    | 44              | 157         | 28                | 62               | 24                                       | 70            | 6                                               | 7                    | 4.2*                                     |
| ene_one_hal         | 17              | 61          | 27.9              | 27               | 16                                       | 44            | 5                                               | 9                    | 4.2*                                     |
| hzone_acyl_naphthol | 1               | 4           | 25                | 1                | 1                                        | 4             | 1                                               | 2                    | 3.8                                      |
| imine_one_A         | 3               | 12          | 25                | 6                | 2                                        | 6             | 2                                               | 3                    | 3.8                                      |
| rhod_sat_A          | 18              | 75          | 24                | 32               | 15                                       | 39            | 4                                               | 6                    | 3.6*                                     |
| thiophene_amino_Aa  | 66              | 286         | 23.1              | 107              | 37                                       | 108           | 7                                               | 9                    | 3.5*                                     |
| amino_acridine_A    | 27              | 118         | 22.9              | 67               | 15                                       | 39            | 6                                               | 7                    | 3.5*                                     |
| thio_dibenzo        | 8               | 37          | 21.6              | 13               | 7                                        | 28            | 3                                               | 5                    | 3.3*                                     |
| ene_five_het_F      | 3               | 14          | 21.4              | 6                | 3                                        | 14            | 2                                               | 5                    | 3.2*                                     |
| diazox_sulfon_A     | 3               | 15          | 20                | 6                | 3                                        | 14            | 2                                               | 6                    | 3                                        |
| anil_alk_ene        | 91              | 460         | 19.8              | 149              | 42                                       | 187           | 7                                               | 9                    | 3*                                       |
| naphth_amino_A      | 21              | 107         | 19.6              | 38               | 20                                       | 56            | 6                                               | 8                    | 3*                                       |
| thiophene_amino_Ab  | 13              | 68          | 19.1              | 28               | 13                                       | 45            | 6                                               | 9                    | 2.9*                                     |
| quinone_A           | 109             | 639         | 17.1              | 194              | 53                                       | 204           | 8                                               | 10                   | 2.6*                                     |
| dhp_bis_amino_CN    | 1               | 6           | 16.7              | 3                | 1                                        | 5             | 1                                               | 2                    | 2.5                                      |
| ene_five_het_C      | 3               | 18          | 16.7              | 14               | 3                                        | 11            | 2                                               | 5                    | 2.5                                      |
| indol_3yl_alk       | 145             | 871         | 16.6              | 355              | 87                                       | 211           | 11                                              | 13                   | 2.5*                                     |
| anil_di_alk_D       | 17              | 105         | 16.2              | 53               | 9                                        | 32            | 3                                               | 9                    | 2.4*                                     |
| mannich_A           | 105             | 651         | 16.1              | 326              | 65                                       | 234           | 10                                              | 13                   | 2.4*                                     |
| het_pyridiniums_A   | 39              | 252         | 15.5              | 58               | 17                                       | 154           | 6                                               | 8                    | 2.3*                                     |
| ene_rhod_A          | 205             | 1345        | 15.2              | 416              | 63                                       | 285           | 8                                               | 11                   | 2.3*                                     |
| sulfonamide_B       | 12              | 80          | 15                | 34               | 12                                       | 39            | 4                                               | 6                    | 2.3                                      |
| keto_keto_beta_A    | 23              | 156         | 14.7              | 52               | 19                                       | 79            | 6                                               | 9                    | 2.2*                                     |
| ene_six_het_A       | 6               | 42          | 14.3              | 34               | 5                                        | 24            | 3                                               | 8                    | 2.2                                      |
| pyrrole_A           | 81              | 575         | 14.1              | 158              | 46                                       | 279           | 5                                               | 12                   | 2.1*                                     |
| anil_di_alk_C       | 283             | 2053        | 13.8              | 604              | 74                                       | 374           | 9                                               | 14                   | 2.1*                                     |
| azo_A               | 60              | 443         | 13.5              | 189              | 29                                       | 166           | 7                                               | 10                   | 2*                                       |
| ene_cyano_A         | 1               | 8           | 12.5              | 4                | 1                                        | 7             | 1                                               | 5                    | 1.9                                      |
| pyrrole_B           | 25              | 212         | 11.8              | 89               | 12                                       | 56            | 6                                               | 7                    | 1.8*                                     |
| anil_no_alk         | 51              | 459         | 11.1              | 117              | 36                                       | 271           | 8                                               | 11                   | 1.7*                                     |
| anthranil_one_A     | 33              | 301         | 11                | 80               | 31                                       | 204           | 7                                               | 10                   | 1.7                                      |
| imidazole_A         | 48              | 446         | 10.8              | 145              | 24                                       | 165           | 9                                               | 11                   | 1.6*                                     |

|                          |      |       |     |      |     |     |    |    |            |
|--------------------------|------|-------|-----|------|-----|-----|----|----|------------|
| <b>ene_five_het_A</b>    | 7    | 74    | 9.5 | 28   | 6   | 36  | 5  | 7  | <b>1.4</b> |
| <b>anil_di_alk_E</b>     | 68   | 842   | 8.1 | 411  | 48  | 311 | 10 | 15 | <b>1.2</b> |
| <b>anil_di_alk_B</b>     | 19   | 256   | 7.4 | 74   | 16  | 164 | 7  | 11 | <b>1.1</b> |
| <b>thiaz_ene_A</b>       | 12   | 171   | 7   | 43   | 10  | 150 | 9  | 12 | <b>1.1</b> |
| <b>catechol_A</b>        | 40   | 699   | 5.7 | 161  | 32  | 290 | 10 | 10 | <b>0.9</b> |
| <b>cyano_pyridone_B</b>  | 14   | 257   | 5.4 | 29   | 13  | 142 | 4  | 9  | <b>0.8</b> |
| <b>anil_di_alk_A</b>     | 1215 | 32029 | 3.8 | 2662 | 297 | 791 | 12 | 14 | <b>0.6</b> |
| <b>hzone_phenol_A</b>    | 3    | 84    | 3.6 | 19   | 3   | 29  | 3  | 6  | <b>0.5</b> |
| <b>imine_one_isatin</b>  | 1    | 30    | 3.3 | 9    | 1   | 14  | 1  | 5  | <b>0.5</b> |
| <b>ene_five_het_B</b>    | 5    | 157   | 3.2 | 16   | 5   | 152 | 2  | 8  | <b>0.5</b> |
| <b>hzone_enamin</b>      | 1    | 51    | 2   | 9    | 1   | 21  | 1  | 3  | <b>0.3</b> |
| <b>sulfonamide_A</b>     | 2    | 105   | 1.9 | 3    | 2   | 105 | 2  | 5  | <b>0.3</b> |
| <b>ene_five_het_E</b>    | 0    | 9     | 0   | 2    | 0   | 9   | 0  | 2  | <b>0</b>   |
| <b>ene_one_ene_A</b>     | 0    | 4     | 0   | 3    | 0   | 3   | 0  | 2  | <b>0</b>   |
| <b>ene_one_ester</b>     | 0    | 2     | 0   | 1    | 0   | 1   | 0  | 1  | <b>0</b>   |
| <b>hzone_anil_di_alk</b> | 0    | 8     | 0   | 1    | 0   | 8   | 0  | 1  | <b>0</b>   |
| <b>hzone_phenol_B</b>    | 0    | 34    | 0   | 14   | 0   | 31  | 0  | 7  | <b>0</b>   |
| <b>hzone_pipzn</b>       | 0    | 1     | 0   | 1    | 0   | 1   | 0  | 1  | <b>0</b>   |

<sup>a</sup>Assays for which at least one molecule matching the rule is found to have a high hill slope. <sup>b</sup>Gene families for which at least one molecule matching the rule is found to have a high hill slope. <sup>c</sup>A star indicates statistical significance (FDR<0.1)



**Table S7. Summary of findings across all issues by alert**

Enrichments for each factor considered for each alert are shown, calculated from the raw data. Those alerts showing enrichment in the raw data and statistically significant changes (FDR<0.1) once the data has been normalized by target and stats corrected for multiple hypothesis testing are highlighted in green (as described below). Totals per rule and per factor are only those showing statistically significant increases. Blank cells indicate no data available.

| PAINS Alert        | Overall | AS  | ELISA | FB  | FP  | FRET | SPA | Overall<br>HS | AS<br>HS | ELISA<br>HS | FB<br>HS | FP<br>HS | FRET<br>HS | SPA<br>HS | QC   | Cytotox | Total<br>demerits |
|--------------------|---------|-----|-------|-----|-----|------|-----|---------------|----------|-------------|----------|----------|------------|-----------|------|---------|-------------------|
| anil_di_alk_A      | 1.9     | 3.4 | 1.6   | 2   | 4.1 | 3.1  | 1.3 | 0.6           | 0.6      | 1.5         | 1.1      | 0.8      | 0.4        | 0.8       | 0.6  | 1.8     | 9                 |
| het_pyridiniums_A  | 1.2     | 1.3 | 0.6   | 0.6 | 0.7 | 1.5  | 4.2 | 2.3           | 3.2      | 2.3         | 4.7      | 2.3      | 1.8        | 1.9       | 6.3  | 2.4     | 5                 |
| azo_A              | 1.1     | 4.5 | 1.9   | 0.9 | 1.8 | 1.8  | 1.9 | 2             | 0.7      | 1.1         | 0.3      | 2.7      | 1.8        | 0.8       | 6.7  | 1       | 5                 |
| catechol_A         | 1       | 2.9 | 0.7   | 1.2 | 2   | 2    | 2   | 0.9           | 1        | 0.9         | 0.8      | 1        | 0.8        | 1.3       | 3.9  | 2.3     | 2                 |
| ene_rhod_A         | 1       | 3.2 | 1.3   | 0.6 | 1.8 | 1.5  | 1.6 | 2.3           | 1.2      | 0.2         | 2.4      | 2.4      | 1.5        | 2.6       | 5.3  | 1.4     | 9                 |
| anil_alk_ene       | 1       | 3   | 0.4   | 0.4 | 2.6 | 2.1  | 0.9 | 3             | 0.4      | 0           | 0        | 2.7      | 3.9        | 2         | 10   | 2.6     | 8                 |
| quinone_A          | 1       | 4.4 | 1.8   | 1   | 2.1 | 0.8  | 2.2 | 2.6           | 0.8      | 1.1         | 2.1      | 1.6      | 2.7        | 2.9       | 9.2  | 4       | 7                 |
| ene_five_het_E     | 0.9     | 3.3 | 0     | 0   | 0   | 2.3  | 1   | 0             | 0        |             |          |          | 0          | 0         | 9.5  | 0.3     | 1                 |
| cyano_pyridone_B   | 0.8     | 0.3 | 0     | 0.3 | 0.2 | 1.9  | 0.7 | 0.8           | 4.5      |             | 0        | 0        | 1.1        | 2.2       | 0    | 0.2     | 0                 |
| thiophene_amino_Aa | 0.8     | 3.3 | 0.5   | 0.7 | 1.7 | 0.7  | 1.6 | 3.5           | 1.6      | 0.5         | 4.9      | 2.2      | 5.9        | 2.1       | 3.2  | 0.8     | 9                 |
| pyrrole_B          | 0.8     | 7.9 | 0.4   | 0.1 | 0.3 | 0.6  | 0.3 | 1.8           | 0.2      | 3.5         | 3.9      | 1.7      | 9.3        | 0.9       | 16.9 | 0.7     | 4                 |
| cyano_pyridone_A   | 0.7     | 2.5 | 0.8   | 0.1 | 1   | 0.7  | 1.6 | 4.2           | 2.6      | 1.2         | 0        | 0.6      | 11.7       | 2.2       | 7.3  | 0.3     | 6                 |
| sulfonamide_A      | 0.7     | 0   | 2.5   | 0.1 | 1.4 | 2.4  | 0   | 0.3           | 4.5      | 0           | 0        | 6.9      | 0          | 0         | 0    | 0.8     | 0                 |
| ene_five_het_B     | 0.7     | 1.9 | 1.5   | 0.4 | 0.6 | 1.9  | 0.6 | 0.5           | 0.9      | 0.9         | 0        | 0        | 0          | 5.1       | 0    | 2.5     | 2                 |
| rhod_sat_A         | 0.7     | 2.4 | 1.7   | 0.1 | 1.2 | 0.6  | 1   | 3.6           | 2.7      | 0.2         | 0        | 1.9      | 10.7       | 2.5       | 0    | 0       | 3                 |
| sulfonamide_B      | 0.6     | 5.2 | 0.2   | 0.6 | 1   | 0.2  | 0.3 | 2.3           | 0.2      | 3.5         | 0        | 1.9      | 21.6       | 1.7       | 0    | 1.3     | 2                 |
| anil_no_alk        | 0.5     | 1.7 | 0.5   | 1.2 | 0.6 | 0.4  | 0.7 | 1.7           | 0.7      | 1.1         | 1.2      | 1.4      | 2.7        | 2.3       | 0.8  | 1       | 2                 |
| thio_dibenzo       | 0.5     | 1.8 | 1.8   | 0.2 | 1.2 | 0.5  | 0.6 | 3.3           | 1.8      | 0           | 0        | 1.2      | 7.6        | 4.8       | 19   | 0.4     | 1                 |
| naphth_amino_A     | 0.5     | 1.9 | 2     | 0.2 | 1.7 | 0.4  | 1   | 3             | 1.7      | 1.2         | 0        | 1.4      | 5.4        | 1         | 0    | 1.3     | 4                 |
| anthranil_one_A    | 0.5     | 1.5 | 0.8   | 0.6 | 1.6 | 0.4  | 0.8 | 1.7           | 0.9      | 0.6         | 2.3      | 1.3      | 2.2        | 0.6       | 3.2  | 2.4     | 2                 |
| anil_di_alk_C      | 0.5     | 1.8 | 0.3   | 0.3 | 0.4 | 0.3  | 1.4 | 2.1           | 1.5      | 0.6         | 1.3      | 2.5      | 2.3        | 1         | 3.5  | 0.3     | 7                 |
| anil_di_alk_B      | 0.5     | 1.7 | 0.2   | 0.3 | 0.5 | 1.1  | 0.5 | 1.1           | 0.5      | 0.7         | 1.5      | 1.1      | 0.7        | 2.2       | 6.3  | 0.3     | 2                 |
| ene_one_hal        | 0.5     | 1.4 | 2     | 0.3 | 0.7 | 0.4  | 0.9 | 4.2           | 0.6      | 0.3         | 4.7      | 2.6      | 15.2       | 4         | 6.9  | 1.8     | 2                 |
| pyrrole_A          | 0.4     | 1.2 | 0.4   | 0.4 | 0.9 | 0.7  | 0.6 | 2.1           | 0.6      | 0.4         | 0.5      | 2.1      | 3.8        | 2.1       | 5.7  | 0.3     | 2                 |
| anil_di_alk_E      | 0.4     | 1.9 | 0.4   | 0.8 | 0.1 | 0.3  | 0.7 | 1.2           | 0.2      | 0.3         | 0.9      | 2.6      | 2.6        | 1.7       | 0.6  | 0.5     | 1                 |

|                     |     |     |     |     |     |     |     |      |     |     |      |     |      |      |      |     |   |
|---------------------|-----|-----|-----|-----|-----|-----|-----|------|-----|-----|------|-----|------|------|------|-----|---|
| anil_di_alk_D       | 0.4 | 3.1 | 0.5 | 0.2 | 0.1 | 0.2 | 0.5 | 2.4  | 1.2 | 0   | 0    | 0   | 3.4  | 0.8  | 3.8  | 0   | 2 |
| keto_keto_beta_A    | 0.3 | 1   | 0.6 | 0.7 | 0.5 | 0.3 | 0.3 | 2.2  | 1.3 | 0   | 0    | 2.1 | 4.7  | 1.6  | 11.4 | 0.5 | 2 |
| ene_cyano_A         | 0.3 | 4.2 | 1.7 | 0.2 | 0.5 | 0.5 | 1.3 | 1.9  | 4.5 | 0   | 0    | 0   | 0    | 0    | 0    | 3   | 1 |
| indol_3yl_alk       | 0.3 | 0.9 | 0.2 | 0.4 | 0.4 | 0.4 | 0.5 | 2.5  | 0.8 | 1   | 1.3  | 2.1 | 5.6  | 1.9  | 1.1  | 0.3 | 4 |
| mannich_A           | 0.3 | 0.9 | 0.3 | 0.5 | 0.2 | 0.4 | 0.4 | 2.4  | 1.1 | 0.8 | 0.7  | 2.7 | 7.7  | 1    | 2    | 1.3 | 4 |
| ene_five_het_A      | 0.3 | 2.6 | 0   | 0.1 | 0.1 | 1.3 | 0.5 | 1.4  | 0.6 |     | 0.6  | 2.3 | 5.5  | 1.7  | 0    | 2.1 | 1 |
| ene_five_one_A      | 0.3 | 1.9 | 0   | 0.1 | 0.7 | 0.2 | 0.4 | 4.9  | 0   |     | 0    | 2.3 | 15.2 | 3    | 19   | 0   | 2 |
| imine_one_A         | 0.2 | 3.5 | 0   | 0.4 | 0   | 0.4 | 0.2 | 3.8  | 0   |     | 10   |     | 0    |      | 0    | 0   | 0 |
| het_6_tetrazine     | 0.2 | 1.4 | 0.7 | 0.1 | 0   | 0.2 | 0.3 | 4.3  | 0   | 0.9 | 23.3 |     | 4.3  | 7.1  | 0    | 0.3 | 2 |
| thiophene_amino_Ab  | 0.2 | 0.3 | 0.4 | 0.2 | 0.3 | 0.3 | 0.3 | 2.9  | 1.5 |     | 0    | 1.1 | 6.5  | 3.2  | 0.2  | 0   | 2 |
| hzone_phenol_A      | 0.2 | 1   | 1.4 | 0.3 | 0.2 | 0.2 | 0.3 | 0.5  | 0   | 1.7 | 0    | 2.3 | 0    | 4    | 3.2  | 1.5 | 0 |
| hzone_enamin        | 0.2 | 1.5 | 0.9 | 0.3 | 0.1 | 0.1 | 0.1 | 0.3  | 0   | 1.7 | 0    |     | 0    | 0    | 1.3  | 0   | 0 |
| hzone_phenol_B      | 0.2 | 1.9 | 0   | 0.2 | 0.2 | 0.6 | 0.1 | 0    | 0   |     | 0    | 0   | 0    | 0    | 0    | 0   | 0 |
| ene_five_het_C      | 0.2 | 2.6 | 1   | 0.1 | 0.3 | 0   | 0.4 | 2.5  | 0.6 | 3.5 | 0    | 3.5 |      | 0    | 19   | 0   | 0 |
| diazox_sulfon_A     | 0.2 | 1.1 | 0.8 | 0.1 | 0.1 | 0.2 | 0.2 | 3    | 1.3 | 0   | 0    | 3.5 | 0    | 0    | 0    | 0.2 | 0 |
| ene_six_het_A       | 0.2 | 1   | 0   | 0.1 | 0.9 | 0.3 | 0.9 | 2.2  | 1.1 |     | 0    | 2.6 | 10.1 | 0    | 0    | 0   | 1 |
| het_65_A            | 0.1 | 0.5 | 0.8 | 0.1 | 0   | 0   | 0.6 | 5    | 0   |     | 23.3 | 0   |      | 4    | 0    | 0   | 0 |
| thiaz_ene_A         | 0.1 | 0.6 | 0.1 | 0.1 | 0.1 | 0.1 | 0.2 | 1.1  | 0.3 | 0   | 1.2  | 4.2 | 1.4  | 1.1  | 3.2  | 0.2 | 0 |
| thiaz_ene_B         | 0.1 | 0.3 | 0.4 | 0   | 0.2 | 0.1 | 0   | 7.6  | 4.5 | 0   |      | 3.5 | 0    |      | 0    | 0   | 1 |
| ene_one_ene_A       | 0.3 | 2.6 |     | 0   | 0   | 2.3 | 0   | 0    | 0   |     |      |     | 0    |      | 19   | 2.6 | 0 |
| imidazole_A         | 1.2 | 3.5 | 3.7 | 2.1 | 0.5 | 0.8 | 0.3 | 1.6  | 0.8 | 0.2 | 1.5  | 3.8 | 1.6  | 1.5  |      | 2   | 7 |
| amino_acridine_A    | 0.7 | 0.8 | 0.8 | 0.5 | 1.2 | 1.1 | 4.1 | 3.5  | 2.7 | 3.5 | 1.9  | 6.3 | 5.1  | 1.6  |      | 3.4 | 4 |
| ene_five_het_F      | 0.7 | 4.3 | 0   | 0.8 | 1.1 | 0.3 | 0.7 | 3.2  | 0   |     | 11.6 | 0   | 15.2 | 6    |      | 0   | 1 |
| hzone_acyl_naphthol | 0.4 | 8.9 | 0   | 0   | 0   | 0   | 1.2 | 3.8  | 0   |     |      |     |      | 11.9 |      | 0   | 0 |
| imine_one_fives     | 0.4 | 6.9 | 0   | 0   | 0   | 0   | 2   | 0    | 0   |     |      |     |      | 0    |      | 0   | 0 |
| thiophene_hydroxy   | 0.2 | 0.9 | 0   | 0.7 | 0   | 0.3 | 0.3 | 7.6  |     |     |      |     | 15.2 |      |      | 0   | 0 |
| ene_one_ester       | 0.1 | 0   | 0.6 | 0   | 0.3 | 0.1 | 0   | 0    |     |     |      | 0   | 0    |      |      | 0   | 0 |
| cyano_ene_amine_A   | 0.2 |     | 0   | 0   | 0   | 0   | 1.8 | 7.6  |     |     |      |     |      | 6    |      | 0   | 0 |
| imine_one_isatin    | 0   | 0   |     | 0.1 | 0   | 0.5 | 0.4 | 0.5  |     |     | 0    |     | 0    | 11.9 |      | 1.6 | 0 |
| anthranil_acid_A    | 0.1 |     | 0   | 0   | 0   | 0   | 1.4 |      |     |     |      |     |      |      |      | 0   | 0 |
| dhp_bis_amino_CN    | 0.9 | 3   |     | 1.4 | 5.2 | 0   | 1   | 2.5  | 0   |     | 0    | 3.5 |      | 0    | 19   |     | 0 |
| thio_carbonate_A    | 1   | 0   | 0   | 1   | 5.2 | 0   | 7   | 7.6  |     |     | 0    | 6.9 |      |      |      |     | 0 |
| cyano_imine_A       | 0.3 |     |     | 0.2 | 0   | 0   | 1.6 | 15.1 |     |     | 23.3 |     |      |      |      |     | 0 |

|                          |          |           |          |          |          |          |          |           |          |          |          |           |           |          |           |           |   |
|--------------------------|----------|-----------|----------|----------|----------|----------|----------|-----------|----------|----------|----------|-----------|-----------|----------|-----------|-----------|---|
| <b>hzone_pipzn</b>       | 0        |           |          | 0        | 0        | 3.1      | 0        | 0         |          |          |          |           | 0         |          |           |           | 0 |
| <b>hzone_anil_di_alk</b> | 0        | 0         |          | 0        | 0        |          | 0        | 0         |          |          | 0        |           |           |          |           |           | 0 |
| <b>dyes3A</b>            | 4.9      |           |          |          |          |          | 4.7      | 7.6       |          |          |          |           |           | 6        |           |           | 1 |
| <b>naphth_amino_B</b>    | 1.5      | 8.3       | 0        | 0        | 13       | 0        |          | 0         |          |          |          | 0         |           |          |           |           | 0 |
| <b>cyano_imine_B</b>     |          |           |          |          |          |          |          |           |          |          |          |           |           |          | 0         | 0.7       | 0 |
| <b>Totals</b>            | <b>5</b> | <b>11</b> | <b>5</b> | <b>2</b> | <b>8</b> | <b>6</b> | <b>9</b> | <b>27</b> | <b>2</b> | <b>1</b> | <b>1</b> | <b>10</b> | <b>15</b> | <b>5</b> | <b>13</b> | <b>11</b> |   |

## PAINS SMARTS Queries discussion

A challenge we faced with utilizing the queries as described in the BH2010 paper was that we found that the aromaticity definitions implemented in SLN/SYBYL were frequently inconsistent with what we observed in other software, nor with our experience and expectations (e.g. 5-membered heterocycles not being classed as aromatic). Since the SYBYL implementation seems to take a very restrictive view of aromaticity, when the queries were directly implemented outside SYBYL, we frequently found many more matches for the queries requiring aromatic atoms and fewer when double bonds were required.

Having translated the alerts, we ran both the SLN queries, and the new implementation against the Lilly collection (~2 million molecules) and manually inspected differences in the matches from both. We iteratively modified the alerts to try to maximally match what we believed was originally intended. If a query depended on aromaticity definitions that differed between implementations, we decided whether to make the query behave more like the original implementation, or more in line with our own expectations of aromaticity. For those alerts not strongly dependent on aromaticity perception, we were able to make very direct translations from the SLN representation, and found excellent concordance between our implementation and what was observed with SLN.

## Statistical assessments of the different datasets

### Treatment of activity and hill slope data

We wanted to normalize the data by target, to achieve this, for each assay format we reduced the data to compound-target pairs (active or inactive). If one compound had been tested in multiple assays against the same target and had always been active or inactive this value was assigned to the compound-target pair. If compounds had been tested in multiple assays against the same target and found both active and inactive these compounds were excluded (this could happen if different assays had a different top concentration for example and happened less than 1% of the time). If a target had no PAINS matching compounds present it was excluded. The percentage of molecules containing PAINS for each target was then calculated, only those between the 5<sup>th</sup> and 95<sup>th</sup> centiles here were kept. A similar approach was taken when looking at the hit rates for each target. Those targets with hit rates between the 5<sup>th</sup> and 95<sup>th</sup> centiles here were kept.

In addition to the raw enrichment values, we have calculated odds ratios which is the ratio of the odds of being active given the presence of a PAINS alert compared to the odds of being active in the absence of a PAINS alert. This was done on the normalized set and provides a complementary value to the enrichment values calculated on the raw data.

### Assessment of statistical significance

With hundreds to thousands of comparisons, using a p-value alone is not stringent enough. The power to detect real effects is great, but the number of false positives (statistically significant effect that turns out to be due to chance alone and not real) is unacceptably high.

Bonferroni adjusted p-values are a way to account for multiple hypothesis testing, however, it frequently gives results that are too stringent and can result in missing real effects with this method. In Statistical terms, the concept of “power” refers to the probability of capturing a real effect. With the Bonferroni approach, our power to capture real effects goes down.<sup>1</sup>

False Discovery Rate (or FDR) strikes a good middle ground of high power and low incidence of false discoveries. Developed by Benjamini and Hochberg, and this is the method we have used here.

Improvements to the FDR have been developed since B&H’s original development. B&H method assumed the null prevalence rate was 100%. By this we mean that the method assumes that every alert has no effect on hit rate (or hill slope, etc), and then challenges the p-value distribution to deny that starting assumption. Recent advances by Brad Efron,<sup>1</sup> and independently by John Storey,<sup>3</sup> attempt to estimate the prevalence rate of the alternative hypothesis by using a smoothed distribution estimate of the density of the p-values input stream. This results in a slight improvement in power.

We used John Storey’s Q value implemented in the R package, “qvalue,” to compute the local FDR.

## Experimental: LCMS purity method

QC was performed using a tiered set of LCMS conditions employing reversed-phase Water/Acetonitrile ballistic gradients in either low or high pH on C18 or polar C18 columns. Purity was determined by UV area percent with MS-based peak identification.

## References

- (1) Efron, B. Size, Power and False Discovery Rates *The Annals of Statistics* **2007**, 35, 4, 1351-1377
- (2) Benjamini, Y.; Hochberg, Y. Controlling the False Discovery Rate: A Practical and Powerful Approach to Multiple Testing *J R Stat Soc Series B Stat Methodol* **1995**, 57, 1, 289-300
- (3) Storey, J. D. A direct approach to false discovery rates *J. R. Statist. Soc. B* **2001**, 64, Part 3, 479-498
